# Supplementary material for: On the taxonomic status and distribution of African species of Otomops (Chiroptera: Molossidae)
Source: PeerJ. 2018 May 24;6:e4864. doi: 10.7717/peerj.4864 (PMC5971098; doi:10.7717/peerj.4864)
Supplement: Supplemental Information 7 [file peerj-06-4864-s007.xlsx]

## Sheet: Sheet1
External measurements of recent Kenyan and Rwandan Otomops specimens that were included in the genetic analysis. Otomops harrisoni averaged larger than O. martiensseni in all characters except ear length, but one-way ANOVAs indicate that only differences in total length (head-and-body plus tail) are significant (P<0.05). The power of these tests is clearly limited by the small number of O. martie…
Institution	catalog number	collector	collector number	taxon	sex	total length	tail length	hind foot length	ear length	mass	forearm length
FMNH-NMK	216756	B. D. Patterson	5301	Otomops harrisoni	f	149	48	16	40	35.5	68
FMNH-NMK	216757	B. D. Patterson	5302	Otomops harrisoni	f	155	44	16	41	39.5	72
FMNH-NMK	216759	B. D. Patterson	5304	Otomops harrisoni	f	151	50	15	40	39.5	70
FMNH-NMK	216761	B. D. Patterson	5306	Otomops harrisoni	m	159	49	16	42	44	71
FMNH-NMK	216762	B. D. Patterson	5307	Otomops harrisoni	m	151	48	16	42	41	68
FMNH-NMK	221002	B. R. Agwanda	1295	Otomops harrisoni	f	153	52	13	34	48	70
FMNH-NMK	221004	B. R. Agwanda	1297	Otomops harrisoni	f	145	47	15	31	45	69
FMNH-NMK	221005	B. R. Agwanda	1299	Otomops harrisoni	f	146	51	15	37	44	70
FMNH-NMK	221006	B. R. Agwanda	1300	Otomops harrisoni	f	151	49	16	31	50	71
FMNH-NMK	225587	B. D. Patterson	6880	Otomops harrisoni	m	156	49	15	43	45	69
FMNH-NMK	225588	B. D. Patterson	6881	Otomops harrisoni	m	153	48	14	43	43.5	72
FMNH-NMK	225589	B. D. Patterson	6882	Otomops harrisoni	m	152	48	14	41	44.5	70
FMNH-NMK	225590	B. D. Patterson	6883	Otomops harrisoni	m	151	48	14	42	41	69
FMNH-NMK	225591	B. D. Patterson	6884	Otomops harrisoni	m	151	49	14	43	42.5	71
NMK	187133	P. W. Webala	3329	Otomops harrisoni	f	149	40	15	41	40.5	70.5
NMK	187134	P. W. Webala	3330	Otomops harrisoni	m	152	43	16	41	43.5	71
NMK	187139	P. W. Webala	3335	Otomops harrisoni	f	147	42	15	40	40.5	69.4
NMK	187140	P. W. Webala	3336	Otomops harrisoni	m	154	46	15	41	42	72.7
PREDICT		P. W. Webala	3271	Otomops harrisoni	m	152	45	13.4	43	31	65.5
PREDICT		P. W. Webala	3272	Otomops harrisoni	m	160	54	12	44	41	72.1
NMK	184401	B. D. Patterson	7518	Otomops martiensseni	m	140	42	14	42	34.5	66
PREDICT		P. W. Webala	3273	Otomops martiensseni	m	145	50	15	39	43	69
